# Supplementary material for: Comprehensive analysis unveils altered binding kinetics of 5-/6-methylCytosine/adenine modifications in R2R3-DNA system
Source: Royal Society of Chemistry journal article supplement (doi:10.1039/d3cp02544f), 2023-01-01
Supplement: d3cp02544f1.pdf [file d3cp02544f1.pdf]

## Support Information

### **Comprehensive Analysis Unveils Altered Binding Kinetics of 5-/6- MethylCytosine/Adenine Modifications in R2R3-DNA System**

*Qihang Wang,<sup>1</sup> Song Luo,<sup>1</sup> Danyang Xiong,<sup>1</sup> Xiaole Xu,<sup>1</sup> Lizhi Wang<sup>\*2</sup> and Lili Duan<sup>\*1</sup>*

<sup>1</sup>School of Physics and Electronics, Shandong Normal University, Jinan, 250014,  
China

<sup>2</sup>College of Integrated Circuits, Ludong University, Yantai, 264025, China

Corresponding author ([yantailizhi@126.com](mailto:yantailizhi@126.com); [duanll@sdu.edu.cn](mailto:duanll@sdu.edu.cn))

**Table S1.** Energy term and standard error of the mean of the binding free energy are being averaged over three trajectories of residues within 5 Å of the binding interface in the R2R3-DNA complex obtained by the ASIE method. (All values are in kcal/mol).

| system | Residues     | $\Delta\Delta E_{vdW}$ | $\Delta\Delta E_{ele}$ | $\Delta\Delta G_{gb}$ | $\Delta\Delta G_{np}$ | $\Delta\Delta H$ | $-T\Delta\Delta S$ | $\Delta\Delta G$ |
|--------|--------------|------------------------|------------------------|-----------------------|-----------------------|------------------|--------------------|------------------|
| WT     | K17          | -0.10(±0.00)           | -105.72(±0.29)         | 99.11(±0.27)          | 0.00(±0.00)           | -6.71(±0.02)     | 2.16               | -4.54(±0.02)     |
|        | K18          | -2.15(±0.14)           | -138.50(±0.55)         | 129.26(±0.50)         | 0.57(±0.01)           | -11.97(±0.13)    | 6.29               | -5.68(±0.13)     |
|        | L20          | -1.39(±0.13)           | 1.22(±0.10)            | -0.50(±0.12)          | 0.12(±0.02)           | -0.79(±0.11)     | 0.45               | -0.35(±0.11)     |
|        | W21          | -2.52(±0.03)           | -12.72(±0.13)          | 13.60(±0.12)          | 0.05(±0.00)           | -1.69(±0.03)     | 1.55               | -0.14(±0.03)     |
|        | H40          | -2.72(±0.12)           | -2.07(±0.43)           | 2.63(±0.39)           | 0.20(±0.01)           | -2.36(±0.11)     | 2.91               | 0.55(±0.11)      |
|        | W41          | -1.51(±0.05)           | -9.87(±0.15)           | 10.20(±0.13)          | 0.08(±0.00)           | -1.25(±0.03)     | 0.78               | -0.47(±0.03)     |
|        | N42          | -0.16(±0.10)           | -8.05(±0.24)           | 6.50(±0.17)           | 0.16(±0.00)           | -1.87(±0.07)     | 3.70               | 1.83(±0.07)      |
|        | R52          | -0.76(±0.02)           | -122.44(±0.22)         | 114.64(±0.20)         | 0.02(±0.00)           | -8.58(±0.04)     | 1.59               | -6.99(±0.04)     |
|        | K55          | -4.72(±0.17)           | -154.20(±0.18)         | 143.96(±0.16)         | 1.15(±0.01)           | -16.11(±0.15)    | 3.35               | -12.76(±0.15)    |
|        | S56          | 1.02(±0.13)            | -5.47(±0.13)           | 4.61(±0.08)           | 0.13(±0.00)           | 0.02(±0.09)      | 1.87               | 1.89(±0.09)      |
|        | R58          | -5.03(±0.17)           | -148.84(±0.15)         | 138.40(±0.12)         | 0.95(±0.01)           | -16.41(±0.14)    | 3.36               | -13.06(±0.14)    |
|        | L59          | -3.08(±0.06)           | -1.59(±0.02)           | 2.41(±0.03)           | 0.44(±0.01)           | -2.70(±0.06)     | 0.33               | -2.37(±0.06)     |
|        | R60          | -0.82(±0.14)           | -131.75(±0.20)         | 122.18(±0.18)         | 0.32(±0.00)           | -10.71(±0.12)    | 2.53               | -8.18(±0.12)     |
|        | M62          | -0.69(±0.01)           | 0.47(±0.32)            | -0.12(±0.32)          | 0.02(±0.00)           | -0.36(±0.02)     | 1.49               | 1.14(±0.02)      |
|        | N63          | -1.78(±0.08)           | -3.39(±0.13)           | 2.87(±0.10)           | 0.39(±0.01)           | -2.69(±0.07)     | 0.92               | -1.77(±0.07)     |
|        | Y64          | -0.75(±0.04)           | 0.25(±0.11)            | 0.01(±0.11)           | 0.08(±0.01)           | -0.57(±0.03)     | 0.66               | 0.10(±0.03)      |
|        | N91          | -0.34(±0.03)           | -6.73(±0.19)           | 6.24(±0.14)           | 0.05(±0.00)           | -0.88(±0.07)     | 2.47               | 1.58(±0.07)      |
|        | R92          | -0.80(±0.11)           | -127.30(±0.63)         | 118.42(±0.53)         | 0.21(±0.01)           | -9.89(±0.13)     | 4.12               | -5.77(±0.13)     |
|        | W93          | -2.91(±0.09)           | -17.05(±0.20)          | 14.85(±0.10)          | 0.23(±0.01)           | -5.34(±0.09)     | 2.88               | -2.46(±0.09)     |
|        | S94          | 1.01(±0.16)            | -6.15(±0.09)           | 4.79(±0.05)           | 0.07(±0.00)           | -0.42(±0.11)     | 1.34               | 0.92(±0.11)      |
| L95    | -0.21(±0.01) | 1.38(±0.09)            | -1.20(±0.09)           | 0.00(±0.00)           | -0.04(±0.01)          | 0.26             | 0.22(±0.01)        |                  |
| K98    | -0.27(±0.07) | -118.32(±1.03)         | 110.76(±0.93)          | 0.13(±0.01)           | -7.96(±0.12)          | 9.02             | 1.06(±0.12)        |                  |
| D105   | -1.36(±0.02) | 142.97(±0.18)          | -133.23(±0.16)         | 0.26(±0.01)           | 8.11(±0.02)           | 0.78             | 8.90(±0.02)        |                  |

|     |      |              |                |               |              |               |      |               |
|-----|------|--------------|----------------|---------------|--------------|---------------|------|---------------|
|     | N106 | -2.60(±0.10) | -1.15(±0.09)   | -0.52(±0.05)  | 0.38(±0.00)  | -4.64(±0.07)  | 1.09 | -3.55(±0.07)  |
|     | Q107 | -1.24(±0.09) | -8.29(±0.20)   | 6.48(±0.14)   | 0.21(±0.01)  | -3.28(±0.09)  | 1.94 | -1.34(±0.09)  |
|     | K109 | -5.75(±0.12) | -153.31(±0.13) | 143.01(±0.11) | 0.80(±0.00)  | -16.85(±0.10) | 2.14 | -14.71(±0.10) |
|     | N110 | -3.41(±0.11) | -2.08(±0.09)   | 0.86(±0.05)   | 0.46(±0.00)  | -5.08(±0.09)  | 1.34 | -3.74(±0.09)  |
|     | Y111 | -0.38(±0.01) | -0.99(±0.05)   | 1.09(±0.04)   | 0.01(±0.00)  | -0.29(±0.01)  | 0.20 | -0.09(±0.01)  |
|     | N113 | -1.63(±0.04) | -1.63(±0.12)   | 2.05(±0.11)   | 0.28(±0.01)  | -1.49(±0.04)  | 0.96 | -0.54(±0.04)  |
|     | T114 | -2.08(±0.06) | -0.21(±0.05)   | 0.53(±0.04)   | 0.30(±0.00)  | -2.05(±0.07)  | 0.53 | -1.53(±0.07)  |
|     | H115 | -0.71(±0.07) | 1.99(±0.37)    | -1.63(±0.36)  | 0.10(±0.02)  | -0.45(±0.08)  | 1.41 | 0.96(±0.08)   |
|     | K17  | -0.17(±0.00) | -113.26(±0.25) | 106.19(±0.23) | 0.00(±0.00)  | -7.24(±0.02)  | 2.67 | -4.57(±0.02)  |
|     | K18  | -1.75(±0.12) | -144.24(±0.66) | 134.75(±0.60) | -0.51(±0.02) | -11.75(±0.14) | 6.20 | -5.55(±0.14)  |
|     | L20  | -5.27(±0.13) | -0.55(±0.05)   | 2.41(±0.06)   | -0.67(±0.02) | -4.08(±0.13)  | 0.75 | -3.33(±0.13)  |
|     | W21  | -2.39(±0.06) | -12.43(±0.14)  | 12.92(±0.12)  | -0.01(±0.00) | -1.91(±0.07)  | 1.04 | -0.87(±0.07)  |
|     | H40  | -2.09(±0.12) | -0.24(±0.46)   | 0.75(±0.43)   | -0.14(±0.01) | -1.72(±0.11)  | 2.38 | 0.66(±0.11)   |
|     | W41  | -1.66(±0.07) | -9.07(±0.15)   | 9.55(±0.13)   | -0.09(±0.00) | -1.27(±0.05)  | 0.89 | -0.37(±0.05)  |
|     | N42  | -0.73(±0.13) | -6.05(±0.31)   | 4.80(±0.23)   | -0.18(±0.01) | -2.15(±0.10)  | 3.29 | 1.14(±0.10)   |
|     | R52  | -1.31(±0.08) | -131.18(±0.20) | 121.95(±0.16) | -0.06(±0.00) | -10.59(±0.07) | 2.68 | -7.91(±0.07)  |
|     | K55  | -5.39(±0.16) | -154.29(±0.26) | 144.02(±0.22) | -1.21(±0.00) | -16.86(±0.14) | 3.36 | -13.50(±0.14) |
|     | S56  | 0.87(±0.15)  | -4.81(±0.10)   | 4.22(±0.06)   | -0.09(±0.00) | 0.20(±0.11)   | 1.35 | 1.55(±0.11)   |
|     | R58  | -4.85(±0.16) | -145.40(±0.15) | 135.07(±0.12) | -0.88(±0.00) | -16.06(±0.14) | 3.17 | -12.88(±0.14) |
| 5mC | L59  | -2.23(±0.09) | -1.27(±0.02)   | 1.81(±0.03)   | -0.36(±0.01) | -2.06(±0.08)  | 0.97 | -1.08(±0.08)  |
|     | R60  | -1.39(±0.10) | -131.46(±0.25) | 122.04(±0.22) | -0.31(±0.00) | -11.13(±0.08) | 2.77 | -8.35(±0.08)  |
|     | M62  | -0.80(±0.03) | 2.48(±0.48)    | -2.12(±0.46)  | -0.08(±0.00) | -0.51(±0.05)  | 2.64 | 2.13(±0.05)   |
|     | N63  | -0.26(±0.00) | -1.29(±0.07)   | 1.25(±0.07)   | 0.00(±0.00)  | -0.31(±0.00)  | 0.40 | 0.09(±0.00)   |
|     | Y64  | -0.56(±0.02) | 0.11(±0.11)    | 0.09(±0.11)   | -0.04(±0.01) | -0.40(±0.02)  | 0.69 | 0.29(±0.02)   |
|     | N91  | -0.31(±0.01) | -5.70(±0.21)   | 5.57(±0.21)   | -0.05(±0.00) | -0.49(±0.02)  | 4.08 | 3.59(±0.02)   |
|     | R92  | 0.06(±0.13)  | -129.64(±0.48) | 120.20(±0.41) | -0.47(±0.01) | -9.85(±0.13)  | 3.92 | -5.93(±0.13)  |

|      |      |              |                |                |              |               |      |               |
|------|------|--------------|----------------|----------------|--------------|---------------|------|---------------|
|      | W93  | -1.21(±0.04) | -8.51(±0.13)   | 9.28(±0.14)    | -0.08(±0.00) | -0.51(±0.03)  | 2.00 | 1.49(±0.03)   |
|      | S94  | 0.89(±0.14)  | -6.69(±0.22)   | 5.96(±0.18)    | -0.15(±0.00) | 0.01(±0.10)   | 2.54 | 2.55(±0.10)   |
|      | L95  | -0.08(±0.01) | 1.21(±0.07)    | -1.08(±0.08)   | 0.00(±0.00)  | 0.04(±0.00)   | 0.22 | 0.26(±0.00)   |
|      | K98  | -0.14(±0.02) | -103.10(±0.80) | 96.71(±0.75)   | -0.01(±0.00) | -6.53(±0.07)  | 5.97 | -0.56(±0.07)  |
|      | D105 | -1.17(±0.02) | 137.05(±0.15)  | -127.81(±0.13) | -0.24(±0.01) | 7.81(±0.01)   | 0.72 | 8.53(±0.01)   |
|      | N106 | -2.85(±0.08) | 0.84(±0.08)    | -1.98(±0.06)   | -0.32(±0.00) | -4.32(±0.07)  | 0.64 | -3.68(±0.07)  |
|      | Q107 | -0.17(±0.01) | -2.56(±0.09)   | 2.51(±0.09)    | 0.00(±0.00)  | -0.22(±0.01)  | 0.34 | 0.13(±0.01)   |
|      | K109 | -4.50(±0.13) | -149.01(±0.15) | 138.83(±0.13)  | -0.70(±0.00) | -15.38(±0.11) | 2.72 | -12.67(±0.11) |
|      | N110 | -2.28(±0.14) | -1.72(±0.11)   | -0.26(±0.08)   | -0.35(±0.00) | -4.60(±0.11)  | 1.81 | -2.79(±0.11)  |
|      | Y111 | -0.48(±0.02) | 1.27(±0.03)    | -1.03(±0.03)   | -0.03(±0.00) | -0.27(±0.01)  | 0.08 | -0.18(±0.01)  |
|      | N113 | -1.19(±0.04) | -4.11(±0.31)   | 4.25(±0.29)    | -0.18(±0.01) | -1.23(±0.04)  | 2.65 | 1.42(±0.04)   |
|      | T114 | -1.96(±0.06) | -0.50(±0.07)   | 0.88(±0.06)    | -0.27(±0.00) | -1.85(±0.06)  | 0.58 | -1.28(±0.06)  |
|      | H115 | -0.58(±0.04) | 4.17(±0.19)    | -3.68(±0.17)   | -0.07(±0.01) | -0.17(±0.03)  | 0.76 | 0.59(±0.03)   |
|      | K17  | -0.10(±0.00) | -104.64(±0.29) | 98.11(±0.27)   | 0.00(±0.00)  | -6.62(±0.02)  | 2.14 | -4.48(±0.02)  |
|      | K18  | -0.64(±0.08) | -121.24(±1.01) | 113.76(±0.94)  | -0.09(±0.02) | -8.20(±0.15)  | 8.38 | 0.18(±0.15)   |
|      | L20  | -1.86(±0.08) | 0.38(±0.07)    | 0.55(±0.10)    | -0.17(±0.01) | -1.11(±0.06)  | 0.62 | -0.49(±0.06)  |
|      | W21  | -2.21(±0.07) | -12.47(±0.14)  | 13.47(±0.13)   | -0.03(±0.00) | -1.24(±0.06)  | 1.19 | -0.05(±0.06)  |
|      | H40  | -2.62(±0.08) | -1.93(±0.46)   | 2.44(±0.43)    | -0.18(±0.01) | -2.29(±0.08)  | 3.09 | 0.80(±0.08)   |
|      | W41  | -1.52(±0.06) | -10.01(±0.12)  | 10.30(±0.12)   | -0.09(±0.00) | -1.32(±0.05)  | 0.88 | -0.44(±0.05)  |
|      | N42  | -0.21(±0.09) | -6.72(±0.31)   | 5.45(±0.23)    | -0.14(±0.01) | -1.63(±0.09)  | 4.13 | 2.50(±0.09)   |
|      | R52  | -1.38(±0.04) | -123.08(±0.27) | 115.24(±0.24)  | -0.10(±0.00) | -9.33(±0.07)  | 2.13 | -7.20(±0.07)  |
|      | K55  | -4.68(±0.15) | -153.52(±0.23) | 143.29(±0.19)  | -1.05(±1.01) | -15.96(±0.15) | 3.28 | -12.68(±0.15) |
|      | S56  | 1.01(±0.14)  | -5.75(±0.09)   | 4.60(±0.05)    | -0.15(±1.00) | -0.30(±0.09)  | 1.55 | 1.25(±0.09)   |
|      | R58  | -5.50(±0.20) | -146.99(±0.15) | 136.65(±0.13)  | -0.97(±1.01) | -16.81(±0.17) | 3.47 | -13.34(±0.17) |
| 6m1A | L59  | -2.99(±0.04) | -1.54(±0.02)   | 2.34(±0.03)    | -0.41(±0.01) | -2.61(±0.04)  | 0.27 | -2.34(±0.04)  |
|      | R60  | -1.11(±0.13) | -130.22(±0.21) | 120.78(±0.18)  | -0.30(±1.01) | -10.85(±0.10) | 2.67 | -8.18(±0.10)  |

|      |              |                |                |              |               |      |               |
|------|--------------|----------------|----------------|--------------|---------------|------|---------------|
| M62  | -0.89(±0.03) | -1.38(±0.56)   | 1.77(±0.53)    | -0.09(±0.01) | -0.59(±0.04)  | 5.02 | 4.43(±0.04)   |
| N63  | -0.40(±0.02) | -3.35(±0.06)   | 3.33(±0.05)    | -0.01(±0.00) | -0.42(±0.02)  | 0.42 | 0.00(±0.02)   |
| Y64  | -0.59(±0.03) | 0.04(±0.16)    | 0.10(±0.16)    | -0.03(±0.01) | -0.47(±0.03)  | 1.01 | 0.54(±0.03)   |
| N91  | -1.52(±0.09) | -7.98(±0.20)   | 7.12(±0.16)    | -0.19(±0.00) | -2.57(±0.07)  | 4.60 | 2.03(±0.07)   |
| R92  | -1.60(±0.15) | -125.41(±1.20) | 116.52(±1.05)  | -0.28(±1.02) | -10.77(±0.27) | 4.26 | -6.51(±0.27)  |
| W93  | -2.68(±0.10) | -17.93(±0.24)  | 15.10(±0.14)   | -0.12(±1.00) | -5.63(±0.10)  | 3.60 | -2.03(±0.10)  |
| S94  | 0.76(±0.15)  | -4.33(±0.13)   | 3.48(±0.12)    | -0.13(±1.00) | -0.23(±0.11)  | 1.62 | 1.39(±0.11)   |
| L95  | -0.22(±0.01) | 0.88(±0.09)    | -0.75(±0.08)   | 0.00(±0.01)  | -0.10(±0.14)  | 0.25 | 0.15(±0.14)   |
| K98  | -0.44(±0.07) | -121.00(±1.06) | 113.20(±0.96)  | -0.18(±0.02) | -8.42(±0.14)  | 8.27 | -0.15(±0.14)  |
| D105 | -1.09(±0.02) | 140.42(±0.17)  | -131.09(±0.15) | -0.15(±0.00) | 8.08(±0.02)   | 0.85 | 8.93(±0.02)   |
| N106 | -2.17(±0.12) | -3.23(±0.20)   | 2.57(±0.21)    | -0.39(±1.00) | -3.23(±0.10)  | 1.71 | -1.52(±0.10)  |
| Q107 | -0.39(±0.02) | -3.54(±0.08)   | 3.46(±0.08)    | -0.03(±0.00) | -0.49(±0.03)  | 0.34 | -0.15(±0.03)  |
| K109 | -3.92(±0.11) | -152.47(±0.18) | 142.09(±0.16)  | -0.70(±1.01) | -15.00(±0.10) | 2.75 | -12.25(±0.10) |
| N110 | -2.88(±0.11) | -1.56(±0.15)   | 0.31(±0.09)    | -0.43(±1.00) | -4.57(±0.11)  | 1.64 | -2.93(±0.11)  |
| Y111 | -0.44(±0.03) | 0.26(±0.12)    | -0.10(±0.11)   | -0.02(±0.00) | -0.30(±0.03)  | 0.28 | -0.02(±0.03)  |
| N113 | -0.82(±0.03) | -2.51(±0.20)   | 2.74(±0.19)    | -0.10(±0.01) | -0.68(±0.03)  | 1.48 | 0.80(±0.03)   |
| T114 | -2.16(±0.09) | 0.81(±0.09)    | -0.64(±0.07)   | -0.35(±0.01) | -2.34(±0.10)  | 0.65 | -1.69(±0.10)  |
| H115 | -1.87(±0.13) | -6.09(±0.23)   | 5.48(±0.18)    | -0.37(±1.02) | -2.85(±0.16)  | 1.86 | -0.99(±0.16)  |
| K17  | -0.14(±0.00) | -109.97(±0.24) | 103.10(±0.22)  | 0.00(±0.00)  | -7.00(±0.02)  | 1.77 | -5.23(±0.02)  |
| K18  | -2.63(±0.15) | -144.00(±0.56) | 134.37(±0.50)  | -0.48(±0.01) | -12.74(±0.13) | 5.76 | -6.98(±0.13)  |
| L20  | -3.83(±0.12) | -0.23(±0.07)   | 1.47(±0.10)    | -0.47(±0.02) | -3.06(±0.10)  | 0.77 | -2.29(±0.10)  |
| W21  | -2.48(±0.05) | -12.29(±0.12)  | 12.96(±0.10)   | -0.07(±0.00) | -1.89(±0.06)  | 0.93 | -0.96(±0.06)  |
| H40  | -2.50(±0.08) | -1.02(±0.47)   | 1.55(±0.43)    | -0.15(±0.01) | -2.12(±0.08)  | 2.88 | 0.76(±0.08)   |
| W41  | -1.66(±0.04) | -8.36(±0.18)   | 8.96(±0.16)    | -0.06(±0.00) | -1.12(±0.04)  | 1.30 | 0.18(±0.04)   |
| N42  | -1.45(±0.14) | -2.53(±0.30)   | 2.03(±0.22)    | -0.27(±0.02) | -2.22(±0.15)  | 2.43 | 0.21(±0.15)   |
| R52  | -0.85(±0.01) | -124.60(±0.23) | 116.70(±0.21)  | -0.02(±0.00) | -8.77(±0.03)  | 1.36 | -7.41(±0.03)  |

|      |              |                |                |                |               |               |              |               |
|------|--------------|----------------|----------------|----------------|---------------|---------------|--------------|---------------|
| 6m2A | K55          | -4.43(±0.18)   | -155.19(±0.17) | 144.86(±0.14)  | -1.08(±0.01)  | -15.84(±0.16) | 3.20         | -12.64(±0.16) |
|      | S56          | 0.42(±0.14)    | -4.99(±0.14)   | 4.20(±0.10)    | -0.16(±0.00)  | -0.53(±0.09)  | 1.52         | 0.99(±0.09)   |
|      | R58          | -4.42(±0.16)   | -147.39(±0.17) | 136.87(±0.15)  | -0.87(±0.01)  | -15.80(±0.15) | 3.62         | -12.18(±0.15) |
|      | L59          | -4.06(±0.08)   | -1.39(±0.03)   | 2.19(±0.03)    | -0.51(±0.01)  | -3.77(±0.08)  | 0.57         | -3.20(±0.08)  |
|      | R60          | -1.70(±0.10)   | -127.94(±0.29) | 119.19(±0.25)  | -0.28(±0.01)  | -10.73(±0.09) | 2.58         | -8.15(±0.09)  |
|      | M62          | -0.87(±0.04)   | 2.45(±0.58)    | -1.83(±0.55)   | -0.10(±0.00)  | -0.35(±0.04)  | 3.75         | 3.40(±0.04)   |
|      | N63          | -0.26(±0.00)   | -1.61(±0.05)   | 1.56(±0.05)    | 0.00(±0.00)   | -0.31(±0.00)  | 0.29         | -0.02(±0.00)  |
|      | Y64          | -0.49(±0.02)   | 0.27(±0.10)    | -0.09(±0.09)   | -0.03(±0.00)  | -0.35(±0.02)  | 0.61         | 0.26(±0.02)   |
|      | N91          | -0.18(±0.10)   | -9.56(±0.25)   | 7.89(±0.18)    | -0.14(±0.00)  | -1.99(±0.09)  | 4.82         | 2.83(±0.09)   |
|      | R92          | -0.12(±0.16)   | -122.20(±0.69) | 113.59(±0.59)  | -0.20(±0.01)  | -8.92(±0.13)  | 3.42         | -5.50(±0.13)  |
|      | W93          | -2.57(±0.07)   | -10.99(±0.46)  | 11.08(±0.28)   | -0.11(±0.00)  | -2.59(±0.22)  | 3.28         | 0.69(±0.22)   |
|      | S94          | 0.40(±0.13)    | -6.31(±0.09)   | 5.21(±0.06)    | -0.09(±0.00)  | -0.80(±0.10)  | 1.34         | 0.54(±0.10)   |
|      | L95          | -0.26(±0.02)   | 0.66(±0.09)    | -0.51(±0.09)   | 0.00(±0.00)   | -0.11(±0.01)  | 0.35         | 0.24(±0.01)   |
|      | K98          | -0.31(±0.06)   | -114.32(±1.19) | 106.99(±1.08)  | -0.12(±0.02)  | -7.76(±0.15)  | 7.82         | 0.06(±0.15)   |
|      | D105         | -1.26(±0.03)   | 138.52(±0.16)  | -129.15(±0.14) | -0.25(±0.01)  | 7.86(±0.03)   | 0.94         | 8.80(±0.03)   |
|      | N106         | -2.42(±0.08)   | 1.49(±0.07)    | -2.68(±0.05)   | -0.23(±0.00)  | -3.84(±0.07)  | 0.73         | -3.11(±0.07)  |
|      | Q107         | -0.14(±0.00)   | -1.69(±0.08)   | 1.67(±0.08)    | 0.00(±0.00)   | -0.16(±0.00)  | 0.38         | 0.22(±0.00)   |
|      | K109         | -5.12(±0.13)   | -151.90(±0.17) | 141.52(±0.15)  | -0.81(±0.01)  | -16.32(±0.12) | 2.87         | -13.45(±0.12) |
|      | N110         | -2.51(±0.12)   | -0.92(±0.12)   | -0.20(±0.08)   | -0.28(±0.01)  | -3.91(±0.11)  | 2.15         | -1.76(±0.11)  |
|      | Y111         | -0.32(±0.01)   | 1.00(±0.03)    | -0.85(±0.03)   | 0.00(±0.00)   | -0.18(±0.01)  | 0.09         | -0.09(±0.01)  |
|      | N113         | -2.11(±0.05)   | -2.57(±0.14)   | 3.43(±0.12)    | -0.38(±0.01)  | -1.63(±0.07)  | 1.04         | -0.59(±0.07)  |
|      | T114         | -2.51(±0.09)   | 1.28(±0.05)    | -0.86(±0.05)   | -0.38(±0.00)  | -2.47(±0.09)  | 0.80         | -1.67(±0.09)  |
|      | H115         | -2.48(±0.10)   | -6.07(±0.21)   | 5.38(±0.15)    | -0.41(±0.01)  | -3.57(±0.13)  | 2.28         | -1.29(±0.13)  |
| K17  | -0.08(±0.00) | -102.11(±0.26) | 95.74(±0.24)   | 0.00(±0.00)    | -6.45(±0.02)  | 1.95          | -4.50(±0.02) |               |
| K18  | -1.58(±0.12) | -130.54(±0.95) | 122.27(±0.86)  | -0.36(±0.03)   | -10.22(±0.21) | 8.47          | -1.75(±0.21) |               |
| L20  | -2.56(±0.07) | -0.60(±0.06)   | 1.53(±0.07)    | -0.30(±0.01)   | -1.92(±0.06)  | 0.82          | -1.10(±0.06) |               |

|      |              |                |                |                |               |               |               |               |
|------|--------------|----------------|----------------|----------------|---------------|---------------|---------------|---------------|
| 6mAA | W21          | -1.81(±0.06)   | -9.28(±0.14)   | 10.12(±0.13)   | -0.07(±0.00)  | -1.04(±0.06)  | 1.63          | 0.59(±0.06)   |
|      | H40          | -0.59(±0.03)   | 1.29(±0.47)    | -1.01(±0.43)   | -0.05(±0.01)  | -0.37(±0.05)  | 1.81          | 1.44(±0.05)   |
|      | W41          | -2.27(±0.07)   | -10.29(±0.30)  | 10.52(±0.21)   | -0.12(±0.01)  | -2.16(±0.14)  | 2.55          | 0.39(±0.14)   |
|      | N42          | -1.79(±0.14)   | -2.02(±0.37)   | 1.60(±0.25)    | -0.21(±0.01)  | -2.43(±0.11)  | 3.89          | 1.46(±0.11)   |
|      | R52          | -0.60(±0.02)   | -117.07(±0.23) | 109.72(±0.22)  | -0.01(±0.00)  | -7.96(±0.04)  | 2.07          | -5.89(±0.04)  |
|      | K55          | -4.03(±0.14)   | -153.16(±0.16) | 142.87(±0.13)  | -1.06(±0.01)  | -15.38(±0.12) | 3.43          | -11.95(±0.12) |
|      | S56          | -0.22(±0.01)   | -1.11(±0.12)   | 1.16(±0.12)    | -0.05(±0.00)  | -0.22(±0.01)  | 0.70          | 0.48(±0.01)   |
|      | R58          | -5.24(±0.16)   | -145.82(±0.16) | 135.51(±0.14)  | -0.89(±0.01)  | -16.44(±0.13) | 3.43          | -13.01(±0.13) |
|      | L59          | -3.05(±0.06)   | -1.45(±0.03)   | 2.24(±0.03)    | -0.38(±0.01)  | -2.65(±0.06)  | 0.08          | -2.57(±0.06)  |
|      | R60          | -1.06(±0.14)   | -125.76(±0.21) | 116.96(±0.18)  | -0.25(±0.01)  | -10.10(±0.11) | 2.20          | -7.90(±0.11)  |
|      | M62          | -0.75(±0.03)   | 1.62(±0.50)    | -1.25(±0.49)   | -0.05(±0.00)  | -0.43(±0.04)  | 2.34          | 1.91(±0.04)   |
|      | N63          | -1.10(±0.02)   | -2.65(±0.08)   | 2.76(±0.07)    | -0.12(±0.00)  | -1.12(±0.02)  | 0.34          | -0.78(±0.02)  |
|      | Y64          | -2.55(±0.17)   | -1.10(±0.25)   | 1.40(±0.25)    | -0.27(±0.02)  | -2.53(±0.17)  | 1.91          | -0.62(±0.17)  |
|      | N91          | -0.41(±0.08)   | -10.09(±0.21)  | 8.47(±0.15)    | -0.12(±0.00)  | -2.15(±0.09)  | 3.32          | 1.17(±0.09)   |
|      | R92          | -0.69(±0.15)   | -123.40(±1.14) | 114.64(±0.97)  | -0.21(±0.02)  | -9.66(±0.22)  | 3.60          | -6.06(±0.22)  |
|      | W93          | -2.72(±0.13)   | -19.07(±0.19)  | 15.37(±0.11)   | -0.06(±0.01)  | -6.48(±0.10)  | 2.45          | -4.03(±0.10)  |
|      | S94          | 0.98(±0.17)    | -5.56(±0.19)   | 4.74(±0.17)    | -0.13(±0.00)  | 0.04(±0.11)   | 1.75          | 1.79(±0.11)   |
|      | L95          | -0.19(±0.01)   | 1.09(±0.08)    | -1.00(±0.08)   | 0.00(±0.00)   | -0.10(±0.02)  | 0.26          | 0.16(±0.02)   |
|      | K98          | -0.33(±0.08)   | -122.35(±1.00) | 114.37(±0.90)  | -0.18(±0.02)  | -8.49(±0.13)  | 8.03          | -0.46(±0.13)  |
|      | D105         | -0.98(±0.02)   | 139.07(±0.18)  | -129.76(±0.16) | -0.15(±0.01)  | 8.18(±0.01)   | 1.08          | 9.26(±0.01)   |
|      | N106         | -2.24(±0.09)   | -3.00(±0.17)   | 2.35(±0.17)    | -0.32(±0.00)  | -3.21(±0.07)  | 1.49          | -1.72(±0.07)  |
| Q107 | -0.70(±0.02) | -4.40(±0.08)   | 4.25(±0.07)    | -0.07(±0.00)   | -0.93(±0.03)  | 0.50          | -0.43(±0.03)  |               |
| K109 | -5.44(±0.13) | -154.88(±0.16) | 144.58(±0.14)  | -0.94(±0.00)   | -16.68(±0.12) | 2.91          | -13.77(±0.12) |               |
| N110 | -3.35(±0.12) | -0.59(±0.10)   | -0.48(±0.05)   | -0.42(±0.00)   | -4.85(±0.09)  | 1.37          | -3.48(±0.09)  |               |
| Y111 | -0.46(±0.01) | -1.04(±0.06)   | 1.16(±0.06)    | -0.03(±0.00)   | -0.37(±0.01)  | 0.23          | -0.14(±0.01)  |               |
| N113 | -1.60(±0.06) | -2.36(±0.15)   | 2.57(±0.13)    | -0.26(±0.01)   | -1.65(±0.06)  | 0.84          | -0.81(±0.06)  |               |

---

|             |                     |                     |                     |                     |                     |             |                     |
|-------------|---------------------|---------------------|---------------------|---------------------|---------------------|-------------|---------------------|
| <b>T114</b> | <b>-2.08(±0.09)</b> | <b>-0.02(±0.07)</b> | <b>-0.68(±0.03)</b> | <b>-0.39(±0.00)</b> | <b>-3.17(±0.10)</b> | <b>0.93</b> | <b>-2.24(±0.10)</b> |
| <b>H115</b> | <b>-0.98(±0.12)</b> | <b>2.71(±0.37)</b>  | <b>-2.35(±0.34)</b> | <b>-0.14(±0.02)</b> | <b>-0.76(±0.15)</b> | <b>1.04</b> | <b>0.28(±0.15)</b>  |

---



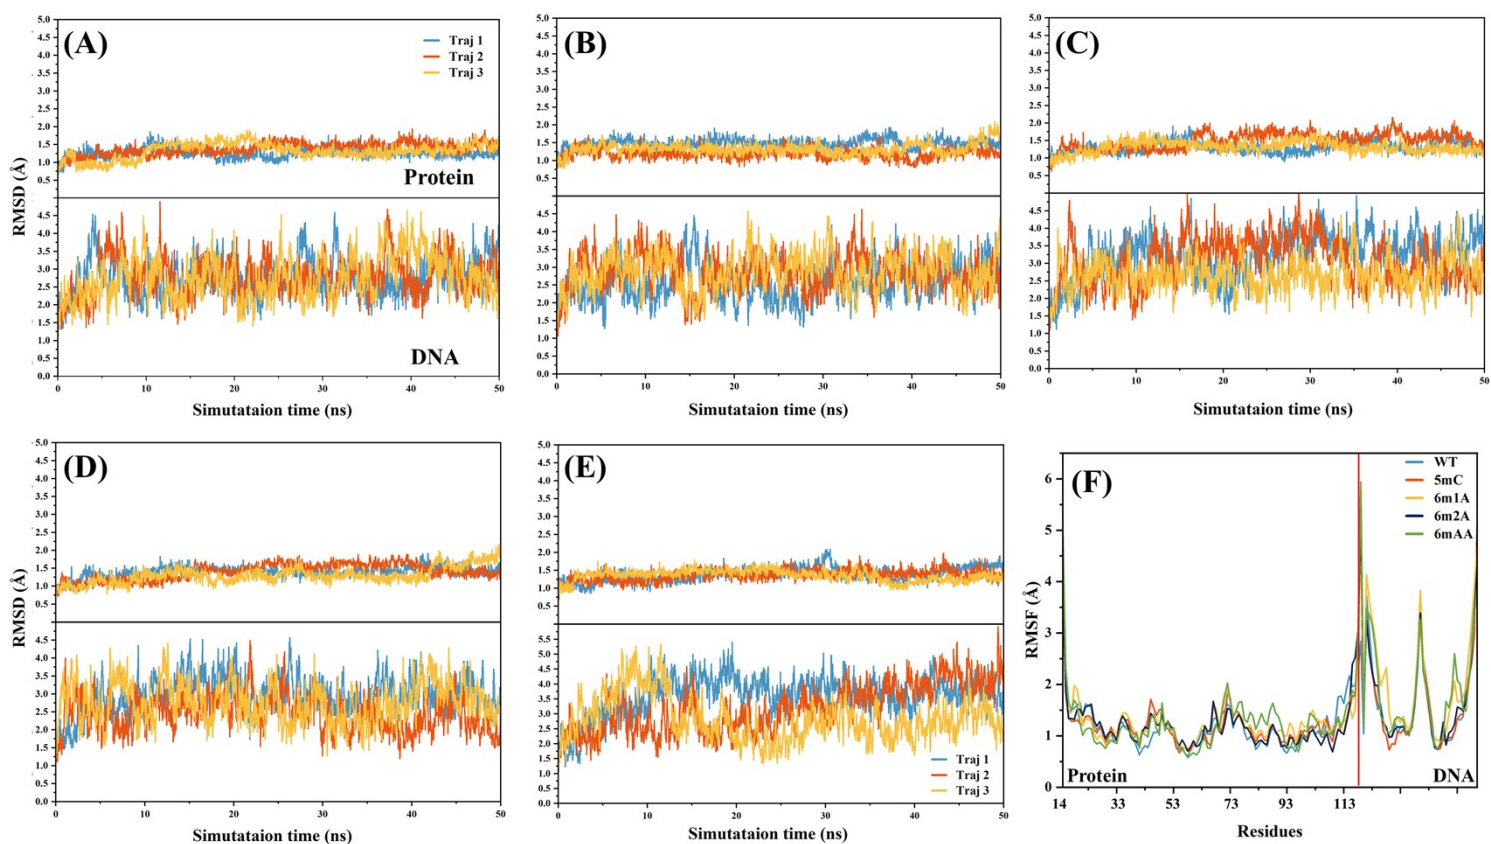

**Figure S1** (A)–(E) RMSD of proteins and DNA for five systems, with different tracks labeled in different colors. (A) WT, (B) 5mC, (C) 6m1A, (D) 6m2A, (E) 6mAA. (F) The RMSF of the five systems is divided into two parts: protein and DNA.
